# Supplementary material for: Effect of baseplate size on primary glenoid stability and impingement-free range of motion in reverse shoulder arthroplasty
Source: PubMed Central journal article supplement (PMC4295354; doi:10.1186/1471-2474-15-417), 2014-12-09

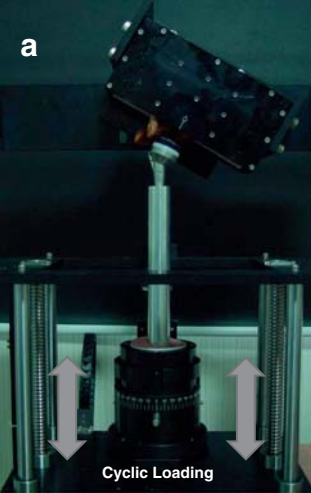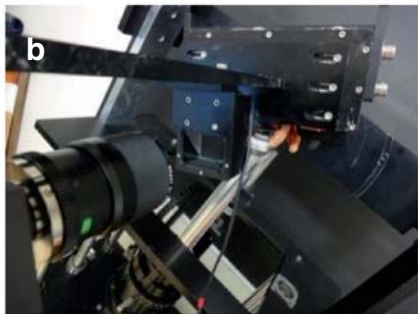

Supplement: 12891_2014_2350_MOESM1_ESM.pdf [file 12891_2014_2350_MOESM1_ESM.pdf]
